# Supplementary material
Source: PubMed Central journal article supplement (PMC10194851)

# High-Throughput Transcriptomics Platform for Screening Environmental Chemicals

## SUPPLEMENTAL MATERIAL

Joshua A. Harrill<sup>1</sup>, Logan J. Everett<sup>1</sup>, Derik E. Haggard<sup>1,2</sup>, Thomas Sheffield<sup>1,2</sup>, Joseph Bundy<sup>1</sup>, Clinton M. Willis<sup>1,3</sup>, Russell S. Thomas<sup>1</sup>, Imran Shah<sup>1</sup>, Richard S. Judson<sup>1</sup>.

<sup>1</sup> Center for Computational Toxicology and Exposure, Office of Research and Development, U.S.

<sup>2</sup> Oak Ridge Institute for Science and Education (ORISE), USA;

<sup>3</sup> Oak Ridge Associated Universities (ORAU), USA;

Environmental Protection Agency, Research Triangle Park, North Carolina, USA

### **Address correspondence to:**

Joshua A. Harrill,

U.S. Environmental Protection Agency

109 TW Alexander Drive (B205-01)

Research Triangle Park, NC 27711.

Telephone: (919) 541-0646,

E-mail: [harrill.joshua@epa.gov](mailto:harrill.joshua@epa.gov).

**Running title:** High-Throughput Transcriptomics

## List of Supplemental Tables

**Table S1.** Further information about chemicals tested in this study. The table shows the known molecular targets or mechanisms of each chemical tested in this study and associated references

**Table S2.** Cell viability assay results. The table provides the mean increase in % of non-viable cells (CV\_Mean\_rval) as measured by propidium iodide dye exclusion and mean increase in % of apoptotic cells (Apop\_Mean\_rval) using caspase 3/7 activation for each concentration of each test chemical. The final column indicates the specific concentrations which were masked from further analysis due to cytotoxicity.

**Table S3.** Sample-level read depth and QC metrics. The treatment information, read depth, and count-based QC metrics for each sample are shown.

## List of Supplemental Figures

**Figure S1. Technical reproducibility of high-throughput transcriptomics on reference RNA mixtures.** Pairwise correlations of log<sub>2</sub> CPM values were calculated between samples of the same reference RNA treatment type (UHRR and HBRR groups) and between samples of different reference RNA types (HBRR:UHRR group).

**Figure S2. Accuracy of reference chemical treatments for multiple analysis parameters.** Distributions of absolute ssGSEA signature scores for specific molecular target signatures across each treatment group, based on 4 different combinations of DESeq2 analysis parameters: +/- plate effect and +/- L2FC shrinkage. PE = Plate Effect; GEN = Genistein; SIRO = Sirolimus; TSA = Trichostatin A; NULL = 1000 simulated chemicals derived from the null distribution (see methods).

## List of Data Files on FigShare

Additional supplemental data files can be found at DOI: [10.23645/epacomptox.13368914](https://doi.org/10.23645/epacomptox.13368914)

- `hWTV1_mcf7_probes.csv`: TempO-Seq human transcriptome version 1 (hWTV1) assay. The identifier, gene name, quality flag, and MCF-7-specific attenuation factor for each probe is shown.
- `mcf7_probe_counts.csv`: Raw probe counts for each sample in CSV format. Each row corresponds to a sample. The first 6 columns contain sample IDs and treatment information, each subsequent column corresponds to a TempO-seq probe.
- `mcf7_gene_l2fc_results.csv`: Differential expression data by gene. Each row corresponds to a distinct treatment (chemical x concentration). The first 7 columns contain treatment information, including chemical identifiers and concentration. Subsequent columns correspond to gene symbols, each data value is a log<sub>2</sub> fold-change estimated using DESeq2, with plate effects included in the model, and shrinkage applied.
- `signatureDB_master_catalog_pilot.xlsx`: Description of gene sets used in the analysis (Excel Format).
- `signatureDB_genelists.RData`: Gene Signature Sets (RData Format).
- `mcf7_bpac_values.xlsx`: The point of departure concentrations for each test chemicals based on ToxCast assays, BMD Express and HTR signature analysis.

## List of Data Files on Gene Expression Omnibus

Raw and processed data is available through Gene Expression Omnibus (GEO) under accession [GSE162855](https://www.ncbi.nlm.nih.gov/geo/query/acc.cgi?acc=GSE162855)

- Raw read data for all samples (FASTQ Format)
- Probe Set Manifest (CSV Format): Supplementary file “[GSE162855\\_hWTV1\\_mcf7\\_probes.csv.gz](#)”
- Probe counts for all samples (CSV format): Supplementary file “[GSE162855\\_htr\\_mcf7\\_pilot\\_count\\_data.csv.gz](#)”

Table S1. Further information about chemicals tested in this study. The table shows the known molecular targets or mechanisms of each chemical tested in this study and associated references.

| DTXSID [1]    | Name                     | CASRN       | Target annotation                                        | Reference for target annotation                                                                                           | % of ToxCast assays Active (# of ToxCast assays) | potential mammalian effect      |
|---------------|--------------------------|-------------|----------------------------------------------------------|---------------------------------------------------------------------------------------------------------------------------|--------------------------------------------------|---------------------------------|
| DTXSID8023216 | 3,5,3'-Triiodothyronine  | 6893-02-3   | Thyroid hormone receptor agonist                         | <a href="https://www.drugbank.ca/drugs/DB00279">https://www.drugbank.ca/drugs/DB00279</a>                                 | 100 / 739 (13.5 %)                               | alters thyroid pathway activity |
| DTXSID3022536 | 4-Cumylphenol            | 599-64-4    | ER agonist                                               | <a href="https://pubs.acs.org/doi/pdf/10.1021/acs.est.5b02641">https://pubs.acs.org/doi/pdf/10.1021/acs.est.5b02641</a>   | 389 / 739 (52.6 %)                               | alters ER pathway activity      |
| DTXSID3037094 | 4-Hydroxytamoxifen       | 68392-35-8  | ER antagonist                                            | <a href="https://www.drugbank.ca/drugs/DB04468">https://www.drugbank.ca/drugs/DB04468</a>                                 | 345 / 756 (45.6 %)                               | alters ER pathway activity      |
| DTXSID5029055 | 4-Nonylphenol, branched  | 84852-15-3  | ER agonist                                               | <a href="https://pubs.acs.org/doi/pdf/10.1021/acs.est.5b02641">https://pubs.acs.org/doi/pdf/10.1021/acs.est.5b02641</a>   | 479 / 804 (59.5 %)                               | alters ER pathway activity      |
| DTXSID7037185 | Amiodarone hydrochloride | 19774-82-4  | Blocks myocardial calcium, potassium and sodium channels | <a href="https://www.drugbank.ca/drugs/DB01118">https://www.drugbank.ca/drugs/DB01118</a>                                 | 253 / 749 (33.8 %)                               | Block ion channel activity      |
| DTXSID9020112 | Atrazine                 | 1912-24-9   | Herbicide, photosystem II inhibitor                      | <a href="https://sitem.herts.ac.uk/aeru/ppdb/en/Reports/43.htm">https://sitem.herts.ac.uk/aeru/ppdb/en/Reports/43.htm</a> | 29 / 866 (3.3 %)                                 | alters mitochondrial activity   |
| DTXSID9020160 | Bifenthrin               | 82657-04-3  | Sodium channel modulator                                 | <a href="https://sitem.herts.ac.uk/aeru/ppdb/en/Reports/78.htm">https://sitem.herts.ac.uk/aeru/ppdb/en/Reports/78.htm</a> | 73 / 844 (8.6 %)                                 | alters ion channel activity     |
| DTXSID7020182 | Bisphenol A              | 80-05-7     | ER agonist                                               | <a href="https://pubs.acs.org/doi/pdf/10.1021/acs.est.5b02641">https://pubs.acs.org/doi/pdf/10.1021/acs.est.5b02641</a>   | 455 / 989 (46.0 %)                               | alters ER pathway activity      |
| DTXSID4022442 | Bisphenol B              | 77-40-7     | ER agonist                                               | <a href="https://pubs.acs.org/doi/pdf/10.1021/acs.est.5b02641">https://pubs.acs.org/doi/pdf/10.1021/acs.est.5b02641</a>   | 340 / 714 (47.6 %)                               | alters ER pathway activity      |
| DTXSID9034365 | Butafenacil              | 134605-64-4 | Herbicide, protoporphyrinogen oxidase (PPO) inhibition   | <a href="https://sitem.herts.ac.uk/aeru/iupac/Reports/1163.htm">https://sitem.herts.ac.uk/aeru/iupac/Reports/1163.htm</a> | 54 / 793 (6.8 %)                                 | unknown                         |
| DTXSID8022828 | Cladribine               | 4291-63-8   | DNA synthesis inhibitor                                  | <a href="https://www.drugbank.ca/drugs/DB00242">https://www.drugbank.ca/drugs/DB00242</a>                                 | 85 / 722 (11.8 %)                                | general cell stress             |

|               |                          |             |                                                                    |                                                                                                                                       |                    |                               |
|---------------|--------------------------|-------------|--------------------------------------------------------------------|---------------------------------------------------------------------------------------------------------------------------------------|--------------------|-------------------------------|
| DTXSID3020336 | Clofibrate               | 637-07-0    | PPAR $\alpha$ agonist, upregulates extrahepatic lipoprotein lipase | <a href="https://www.drugbank.ca/drugs/DB00636">https://www.drugbank.ca/drugs/DB00636</a>                                             | 17 / 736 (2.3 %)   | alters PPAR pathway activity  |
| DTXSID8020337 | Clomiphene citrate (1:1) | 50-41-9     | ER antagonist                                                      | <a href="https://www.drugbank.ca/drugs/DB00882">https://www.drugbank.ca/drugs/DB00882</a>                                             | 343 / 828 (41.4 %) | alters ER pathway activity    |
| DTXSID1023990 | Cyanazine                | 21725-46-2  | Herbicide, photosystem II inhibitor                                | <a href="https://sitem.herts.ac.uk/aeru/ppdb/en/Reports/185.htm">https://sitem.herts.ac.uk/aeru/ppdb/en/Reports/185.htm</a>           | 25 / 826 (3.0 %)   | alters mitochondrial activity |
| DTXSID6024882 | Cycloheximide            | 66-81-9     | Protein synthesis inhibitor                                        | <a href="https://en.wikipedia.org/wiki/Cycloheximide">https://en.wikipedia.org/wiki/Cycloheximide</a>                                 | 337 / 703 (47.9 %) | general cell stress           |
| DTXSID1023998 | Cypermethrin             | 52315-07-8  | Sodium channel modulator                                           | <a href="https://sitem.herts.ac.uk/aeru/ppdb/en/Reports/197.htm">https://sitem.herts.ac.uk/aeru/ppdb/en/Reports/197.htm</a>           | 59 / 872 (6.8 %)   | alters ion channel activity   |
| DTXSID0032601 | Cyproconazole            | 94361-06-5  | Ergosterol-biosynthesis inhibitor. Pan-cyp inhibitor               | <a href="https://www.ncbi.nlm.nih.gov/pubmed/17178690">https://www.ncbi.nlm.nih.gov/pubmed/17178690</a>                               | 47 / 862 (5.4 %)   | alters CYP activity           |
| DTXSID5020366 | Cyproterone acetate      | 427-51-0    | AR antagonist                                                      | <a href="https://www.drugbank.ca/drugs/DB04839">https://www.drugbank.ca/drugs/DB04839</a>                                             | 298 / 720 (41.4 %) | alters AR pathway activity    |
| DTXSID1047310 | Farglitazar              | 196808-45-4 | PPAR $\gamma$ agonist                                              | <a href="https://adisinsight.springer.com/drugs/800008802">https://adisinsight.springer.com/drugs/800008802</a>                       | 222 / 750 (29.6 %) | alters PPAR pathway activity  |
| DTXSID2029874 | Fenofibrate              | 49562-28-9  | PPAR $\alpha$ agonist, upregulates extrahepatic lipoprotein lipase | <a href="https://www.drugbank.ca/drugs/DB01039">https://www.drugbank.ca/drugs/DB01039</a>                                             | 139 / 678 (20.5 %) | alters PPAR pathway activity  |
| DTXSID2032550 | Fenpyroximate (Z,E)      | 111812-58-9 | Mitochondrial electron transport inhibitor                         | <a href="https://sitem.herts.ac.uk/aeru/iupac/Reports/309.htm">https://sitem.herts.ac.uk/aeru/iupac/Reports/309.htm</a>               | 153 / 812 (18.8 %) | alters mitochondrial activity |
| DTXSID7032004 | Flutamide                | 13311-84-7  | AR antagonist                                                      | <a href="https://pubs.acs.org/doi/abs/10.1021/acs.chemrestox.6b00347">https://pubs.acs.org/doi/abs/10.1021/acs.chemrestox.6b00347</a> | 176 / 712 (24.7 %) | alters AR pathway activity    |
| DTXSID7024112 | Fomesafen                | 72178-02-0  | Herbicide, protoporphyrinogen oxidase (PPO) inhibition             | <a href="https://sitem.herts.ac.uk/aeru/iupac/Reports/355.htm">https://sitem.herts.ac.uk/aeru/iupac/Reports/355.htm</a>               | 14 / 676 (2.1 %)   | unknown                       |

|               |                |             |                                                             |                                                                                                                                                                     |                     |                                 |
|---------------|----------------|-------------|-------------------------------------------------------------|---------------------------------------------------------------------------------------------------------------------------------------------------------------------|---------------------|---------------------------------|
| DTXSID4022369 | Fulvestrant    | 129453-61-8 | ER antagonist                                               | <a href="https://www.drugbank.ca/drugs/DB00947">https://www.drugbank.ca/drugs/DB00947</a>                                                                           | 186 / 730 (25.5 %)  | alters ER pathway activity      |
| DTXSID8024151 | Imazalil       | 35554-44-0  | Ergosterol-biosynthesis inhibitor. Pan-cyp inhibitor        | <a href="https://www.ncbi.nlm.nih.gov/pubmed/17178690">https://www.ncbi.nlm.nih.gov/pubmed/17178690</a>                                                             | 252 / 920 (27.4 %)  | alters CYP activity             |
| DTXSID7024160 | Lactofen       | 77501-63-4  | Herbicide, protoporphyrinogen oxidase (PPO) inhibition      | <a href="https://sitem.herts.ac.uk/aeru/ppdb/en/Reports/1160.htm">https://sitem.herts.ac.uk/aeru/ppdb/en/Reports/1160.htm</a>                                       | 97 / 858 (11.3 %)   | unknown                         |
| DTXSID5020784 | Lovastatin     | 75330-75-5  | HMGCR inhibitor                                             | <a href="https://www.drugbank.ca/drugs/DB00227">https://www.drugbank.ca/drugs/DB00227</a>                                                                           | 270 / 750 (36 %)    | alters cholesterol biosynthesis |
| DTXSID9020794 | Maneb          | 12427-38-2  | Inhibition of metal-dependent and sulfhydryl enzyme systems | <a href="https://archive.epa.gov/scipoly/sap/meetings/web/pdf/dithiofinal_aug17.pdf">https://archive.epa.gov/scipoly/sap/meetings/web/pdf/dithiofinal_aug17.pdf</a> | 57 / 1019 (5.6 %)   | general cell stress             |
| DTXSID3034165 | Nilutamide     | 63612-50-0  | AR antagonist                                               | <a href="https://www.drugbank.ca/drugs/DB00665">https://www.drugbank.ca/drugs/DB00665</a>                                                                           | 73 / 684 (10.6 %)   | alters AR pathway activity      |
| DTXSID8031865 | PFOA           | 335-67-1    | PPARg, PPARa agonist                                        | <a href="https://www.ncbi.nlm.nih.gov/pubmed/17047030">https://www.ncbi.nlm.nih.gov/pubmed/17047030</a>                                                             | 32 / 918 (3.5 %)    | alters PPAR pathway activity    |
| DTXSID3031864 | PFOS           | 1763-23-1   | PPARg, PPARa agonist                                        | <a href="https://www.ncbi.nlm.nih.gov/pubmed/17047030">https://www.ncbi.nlm.nih.gov/pubmed/17047030</a>                                                             | 326 / 1007 (32.3 %) | alters PPAR pathway activity    |
| DTXSID4024270 | Prochloraz     | 67747-09-5  | Ergosterol-biosynthesis inhibitor. Pan-cyp inhibitor        | <a href="https://www.ncbi.nlm.nih.gov/pubmed/17178690">https://www.ncbi.nlm.nih.gov/pubmed/17178690</a>                                                             | 186 / 942 (19.7 %)  | alters CYP activity             |
| DTXSID8024280 | Propiconazole  | 60207-90-1  | Ergosterol-biosynthesis inhibitor. Pan-cyp inhibitor        | <a href="https://www.ncbi.nlm.nih.gov/pubmed/17178690">https://www.ncbi.nlm.nih.gov/pubmed/17178690</a>                                                             | 141 / 883 (16.0 %)  | alters CYP activity             |
| DTXSID7032638 | Pyraclostrobin | 175013-18-0 | Mitochondria (complex III) inhibitor                        | PMid:17474024                                                                                                                                                       | 178 / 856 (20.8 %)  | alters mitochondrial activity   |
| DTXSID7021237 | Reserpine      | 50-55-5     | inhibition of the ATP/Mg2+ pump                             | <a href="https://www.drugbank.ca/drugs/DB00206">https://www.drugbank.ca/drugs/DB00206</a>                                                                           | 258 / 700 (36.9 %)  | altera adrenergic signaling     |

|               |                  |             |                                                             |                                                                                                                                                                     |                    |                                 |
|---------------|------------------|-------------|-------------------------------------------------------------|---------------------------------------------------------------------------------------------------------------------------------------------------------------------|--------------------|---------------------------------|
| DTXSID6021248 | Rotenone         | 83-79-4     | Mitochondria (complex I inhibitor)                          | <a href="https://en.wikipedia.org/wiki/Rotenone">https://en.wikipedia.org/wiki/Rotenone</a>                                                                         | 361 / 865 (41.7 %) | alters mitochondrial activity   |
| DTXSID4021268 | Simazine         | 122-34-9    | Herbicide, photosystem II inhibitor                         | <a href="https://sitem.herts.ac.uk/aeru/ppdb/en/Reports/592.htm">https://sitem.herts.ac.uk/aeru/ppdb/en/Reports/592.htm</a>                                         | 22 / 847 (2.6 %)   | alters mitochondrial activity   |
| DTXSID0023581 | Simvastatin      | 79902-63-9  | HMGCR inhibitor                                             | <a href="https://www.drugbank.ca/drugs/DB00641">https://www.drugbank.ca/drugs/DB00641</a>                                                                           | 198 / 728 (27.2 %) | alters cholesterol biosynthesis |
| DTXSID5048186 | Tetrac           | 67-30-1     | T4 synthesis inhibitor                                      | <a href="https://www.ncbi.nlm.nih.gov/pubmed/26307023">https://www.ncbi.nlm.nih.gov/pubmed/26307023</a>                                                             | 188 / 798 (23.6 %) | alters thyroid pathway activity |
| DTXSID5021332 | Thiram           | 137-26-8    | Inhibition of metal-dependent and sulfhydryl enzyme systems | <a href="https://archive.epa.gov/scipoly/sap/meetings/web/pdf/dithiofinal_aug17.pdf">https://archive.epa.gov/scipoly/sap/meetings/web/pdf/dithiofinal_aug17.pdf</a> | 415 / 875 (47.4 %) | general cell stress             |
| DTXSID4032580 | Trifloxystrobin  | 141517-21-7 | Mitochondria (complex III inhibitor)                        | PMid:17474024                                                                                                                                                       | 155 / 822 (18.8 %) | alters mitochondrial activity   |
| DTXSID8023719 | Troglitazone     | 97322-87-7  | PPARg, PPARa agonist                                        | <a href="https://www.drugbank.ca/drugs/DB00197">https://www.drugbank.ca/drugs/DB00197</a>                                                                           | 237 / 713 (33.2 %) | alters PPAR pathway activity    |
| DTXSID4022361 | Vinclozolin      | 50471-44-8  | AR antagonist                                               | <a href="https://pubs.acs.org/doi/abs/10.1021/acs.chemrestox.6b00347">https://pubs.acs.org/doi/abs/10.1021/acs.chemrestox.6b00347</a>                               | 75 / 861 (8.7 %)   | alters AR pathway activity      |
| DTXSID0021464 | Ziram            | 137-30-4    | Inhibition of metal-dependent and sulfhydryl enzyme systems | <a href="https://archive.epa.gov/scipoly/sap/meetings/web/pdf/dithiofinal_aug17.pdf">https://archive.epa.gov/scipoly/sap/meetings/web/pdf/dithiofinal_aug17.pdf</a> | 402 / 690 (58.3 %) | general cell stress             |
| DTXSID5022308 | Genistein *      | 446-72-0    | ER agonist                                                  | <a href="https://www.drugbank.ca/drugs/DB01645">https://www.drugbank.ca/drugs/DB01645</a>                                                                           | 334 / 732 (45.6 %) | alters ER pathway activation    |
| DTXSID5023582 | Sirolimus *      | 53123-88-9  | mTOR inhibitor                                              | <a href="https://en.wikipedia.org/wiki/Sirolimus">https://en.wikipedia.org/wiki/Sirolimus</a>                                                                       | 69 / 97 (71.1 %)   | alters mTOR activity            |
| DTXSID6037063 | Trichostatin A * | 58880-19-6  | Class I & II HDAC inhibitor                                 | <a href="https://en.wikipedia.org/wiki/Trichostatin_A">https://en.wikipedia.org/wiki/Trichostatin_A</a>                                                             | NA                 | alters HDAC activity            |

[1] DTXSID is the DSSTox Generic Substance ID which provides a unique identifier for the substance and references the EPA CompTox Chemicals Dashboard: <https://comptox.epa.gov/dashboard/> . ToxCast activity information accessed via this dashboard on 06-05-2020. (\*) Used as transcriptomic reference treatment.





Supplemental Figure 1 (Related to Figure 3)

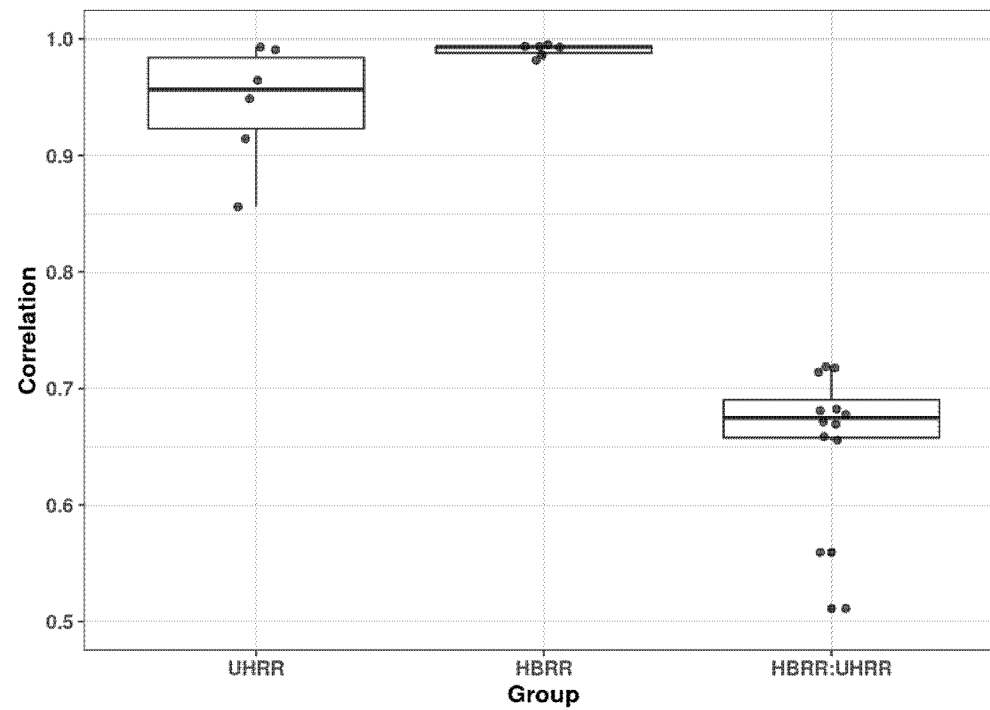

Supplemental Figure 2 (Related to Figure 4)

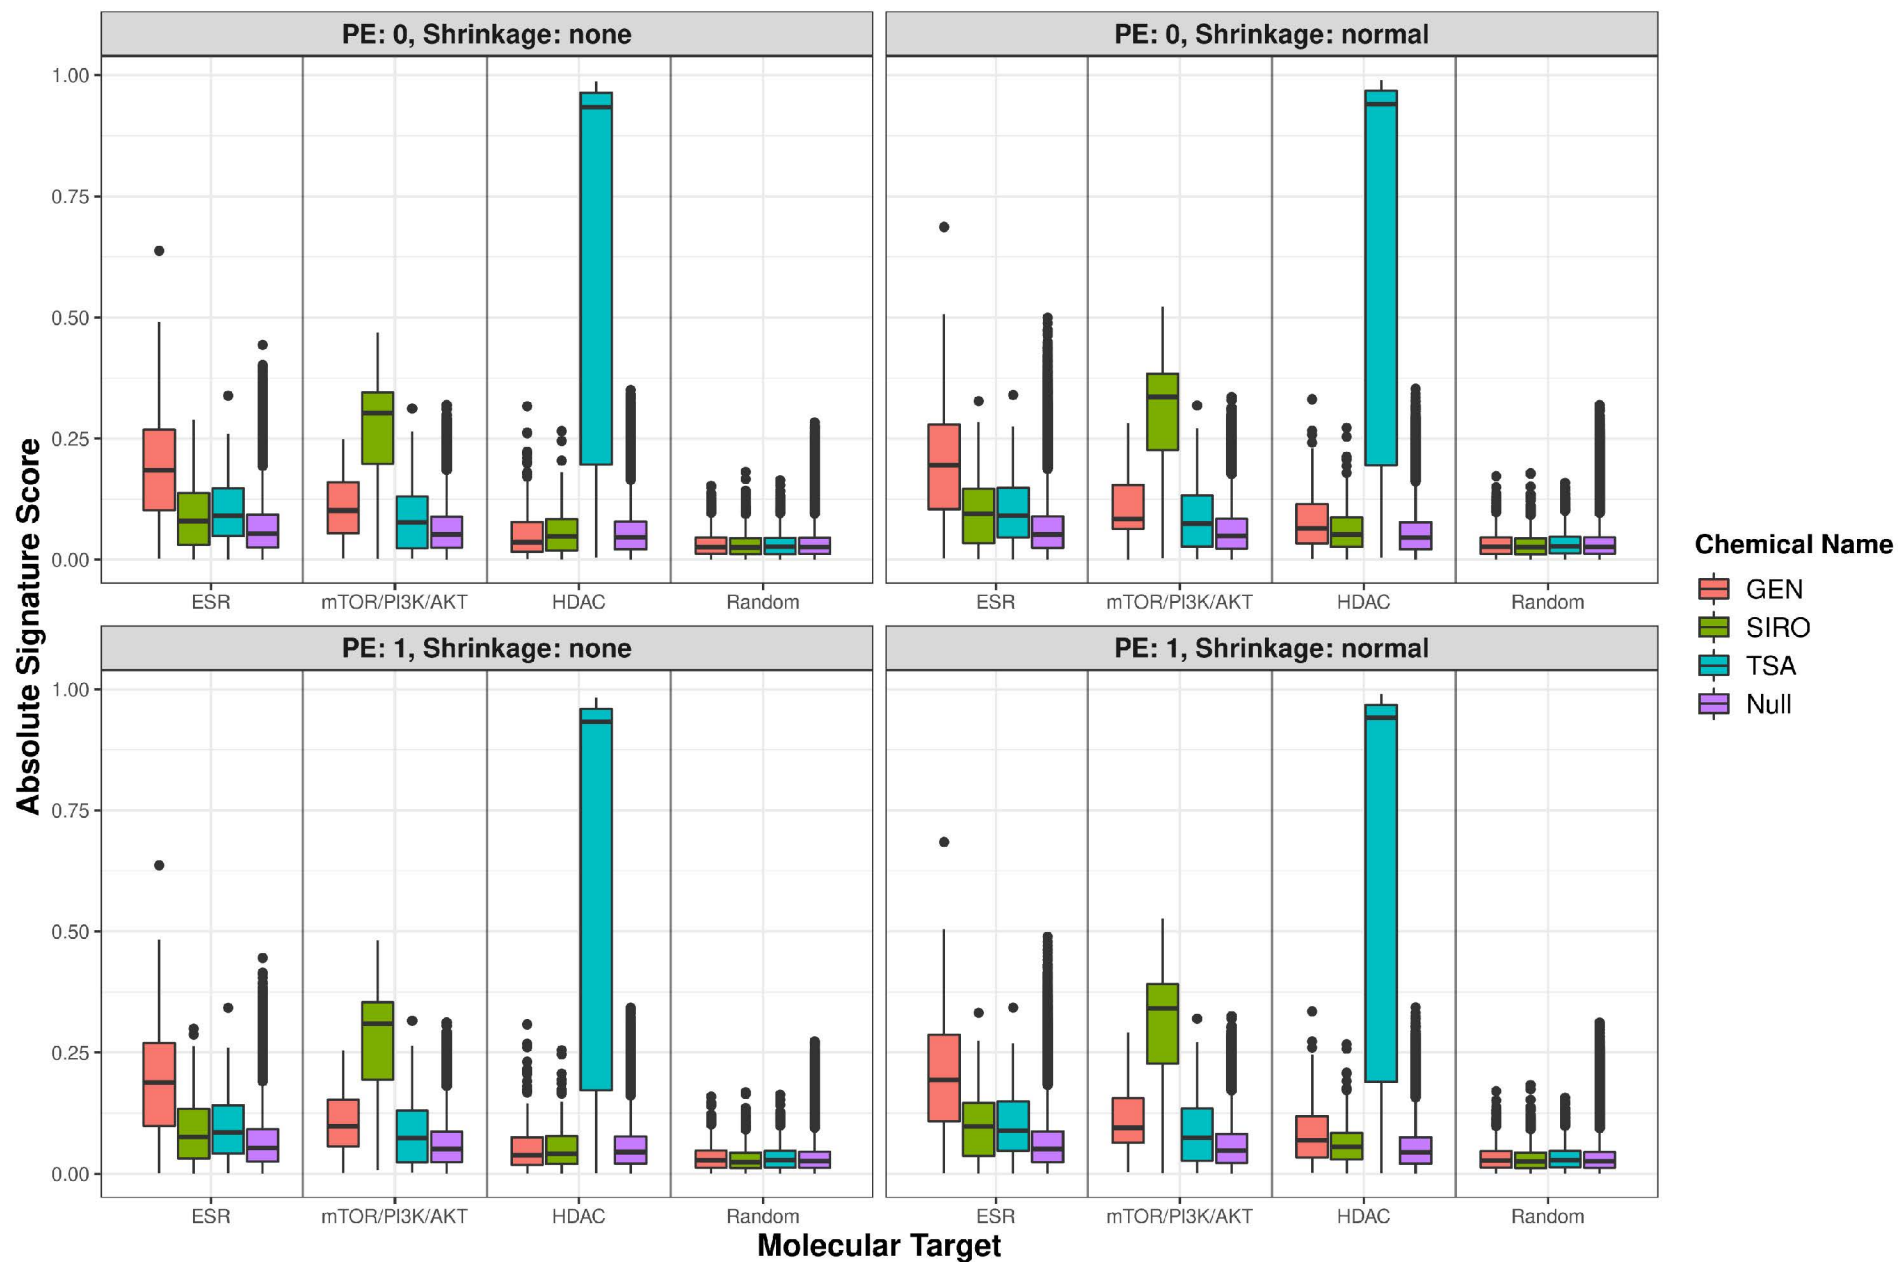

Supplement: NIHMS1724325-supplement-Supplement1.pdf [file NIHMS1724325-supplement-Supplement1.pdf]
